1 *Journal : Molecular Ecology Resources*

2 *Subject area: Computer Programs*

3 **SPART, a versatile and standardized data exchange format**

4 **for species partition information**

5

6 Aurélien Miralles<sup>1\*</sup>, Jacques Ducasse<sup>2</sup>, Sophie Brouillet<sup>1</sup>, Tomas Flouri<sup>3</sup>, Tomochika

7 Fujisawa<sup>4</sup>, Paschalia Kapli<sup>3</sup>, L. Lacey Knowles<sup>5</sup>, Sangeeta Kumari<sup>6</sup>, Alexandros

8 Stamatakis<sup>7,8</sup>, Jeet Sukumaran<sup>9</sup>, Sarah Lutteropp<sup>7</sup>, Miguel Vences<sup>6\*</sup>, Nicolas Puillandre<sup>1\*</sup>

9

10 <sup>1</sup>Institut de Systématique, Évolution, Biodiversité (ISYEB), Muséum national d'Histoire naturelle, CNRS,  
11 Sorbonne Université, EPHE, Université des Antilles 57 rue Cuvier, CP 50, 75005 Paris, France

12 <sup>2</sup>49 rue Eugène Carrière, 75018 Paris, France

13 <sup>3</sup>Centre for Life's Origins and Evolution, Department of Genetics, Evolution and Environment, University  
14 College London, London WC1E 6BT, UK

15 <sup>4</sup>Center for Data Science and Education and Research, Shiga University, 1-1-1 Banba, Hikone, 522-8522, Shiga,  
16 Japan

17 <sup>5</sup>Department of Ecology and Evolution, University of Michigan, Ann Arbor, MI 48109, USA

18 <sup>6</sup>Braunschweig University of Technology, Zoological Institute, Mendelssohnstraße 4, 38106 Braunschweig,  
19 Germany

20 <sup>7</sup>Computational Molecular Evolution Group, Heidelberg Institute for Theoretical Studies, Schloss-  
21 Wolfsbrunnenweg 35, 69118 Heidelberg Germany

22 <sup>8</sup>Institute for Theoretical Informatics, Karlsruhe Institute of Technology, Am Fasanengarten 5, 76131 Karlsruhe,  
23 Germany

24 <sup>9</sup>Biology Department, LS 262, San Diego State University, 5500 Campanile Drive, San Diego, CA 92182-4614,  
25 USA

26

27 **\*Corresponding authors**

28 **Contact:** miralles.skink@gmail.com, m.vences@tu-braunschweig.de, nicolaspuillandre@gmail.com

29

30 **Short running title:** SPART, a standardized format for species partition

31 **Abstract**

32

33 A wide range of data types can be used to delimit species and various computer-based tools  
34 dedicated to this task are now available. Although these formalized approaches have  
35 significantly contributed to increase the objectivity of SD under different assumptions, they  
36 are not routinely used by alpha-taxonomists. One obvious shortcoming is the lack of  
37 interoperability among the various independently developed SD programs. Given the frequent  
38 incongruences between species partitions inferred by different SD approaches, researchers  
39 applying these methods often seek to compare these alternative species partitions to evaluate  
40 the robustness of the species boundaries. This procedure is excessively time consuming at  
41 present, and the lack of a standard format for species partitions is a major obstacle. Here we  
42 propose a standardized format, SPART, to enable compatibility between different SD tools  
43 exporting or importing partitions. This format reports the partitions and describes, for each of  
44 them, the assignment of individuals to the “inferred species”. The syntax also allows to  
45 optionally report support values, as well as original trees and the full command lines used in  
46 the respective SD analyses. Two variants of this format are proposed, overall using the same  
47 terminology but presenting the data either optimized for human readability (matricial SPART)  
48 or in a format in which each partition forms a separate block (SPART.XML). ABGD,  
49 DELINEATE, GMYC, PTP and TR2 have already been adapted to output SPART files and a  
50 new version of LIMES has been developed to import, export, merge and split them.

51

52 **Key words.** Species delimitation programs; SPART; Species partition format; Integrative  
53 taxonomy ; LIMES v2.0

54

55 **Introduction**

56

57 Species delimitation (SD) is a burgeoning, fully fledged research field in systematic biology  
58 (Sites & Marshall 2003; Camargo & Sites 2013; Flot 2015, Ducasse et al. 2020). SD benefits  
59 from the interpretation of species as independent evolutionary lineages (De Queiroz 1998,  
60 2007) that can be distinguished from each other using a variety of operational SD criteria  
61 (Samadi & Barberousse 2006). In integrative taxonomy (Dayrat 2005; Padial et al. 2010),  
62 various lines of evidence and a wide range of data types can be used in formalised analytical  
63 workflows to propose species hypotheses, from DNA barcodes to phylogenomic data, discrete  
64 morphological characters, morphometric measurements, ecological traits, geographic  
65 occurrence, bioacoustic signals, metabolomic profiles, and others (Miralles et al. 2020).

66

67 If many, and among them the earliest, formalised SD procedures are mostly carried out  
68 manually, e.g. by comparing trees with the geographic occurrence of individuals, calculating  
69 correlations between geographic and genetic distances, assessing steepness of hybrid zones,  
70 or seeking for correlation between genetic distance and morphological characters (Good &  
71 Wake 1992, Wiens & Penkrot 2002, Vieites et al. 2009, Flot et al. 2010, Weisrock et al. 2010,  
72 Puillandre et al. 2012a, Miralles & Vences 2013, Derkarabetian & Hedin 2014, Dufresnes et  
73 al. 2015), a substantial number of computer-based tools has been developed to delimit  
74 species, often based on statistical criteria. These programs can analyse large datasets, with a  
75 strong focus on the use of sequence data (Table 1). These methods have significantly  
76 contributed to increase the objectivity, repeatability, and speed of species delimitation  
77 inferences under different mathematical models and assumptions (e.g. Multispecies  
78 coalescent model, DNA barcode gap, haplotype fields of recombination, cf. de Queiroz 1998,

79 2007, Knowles & Carstens 2007, Yang & Rannala 2010, Carstens et al. 2013, Leavitt et al.  
80 2015, Rannala 2015).

81

82 Although the number and importance of SD tools is likely to sharply increase in the  
83 immediate future, they are not yet routinely used in the majority of alpha-taxonomic studies  
84 that result in the naming of over 15,000 new species of organisms every year (Miralles et al.  
85 2020). One obvious shortcoming is the lack of interoperability among the various  
86 independently developed SD programs, and the lack of comprehensive software suites that  
87 offer various user-friendly features, such as those for data visualization and comparison of  
88 results across methods. For instance, incongruent species partitions resulting from different  
89 SD approaches applied to a given dataset are common. They can even be significant, if not  
90 striking in some cases (such as excessive splitting or lumping leading to highly different  
91 number of species delimited; Carstens et al. 2013, Miralles & Vences 2013, Dellicour & Flot  
92 2015, Kapli et al. 2016, Postaire et al. 2016, Renner et al. 2017 for empirical cases; and  
93 Sukumaran & Knowles 2017, Chan et al 2020, Luo et al. 2018, Mason et al. 2020 and Zhang  
94 et al. 2011 for more methodological studies on SD limitations). Integrative taxonomists will  
95 seek to compare these alternative species partitions across SD approaches (but see Rannala  
96 2015), and eventually estimate their robustness by integrating other data sources  
97 (morphological variation, geographic distribution, etc), in order to make an informed choice–  
98 a procedure that is excessively time consuming at present, given the lack of a standard format  
99 for species partitions.

100

101 The main output of species delimitation, and therefore of any SD program, is a species  
102 partition. The term “partition” here follows the set theory concept: the organization of a set of  
103 *elements* into mutually-exclusive and jointly-comprehensive *subsets*, not including the empty  
104 subset (Hrbacek & Jech 1999). In an SD application, the *elements are individuals* (i.e.  
105 samples or specimens), and a specific species delimitation hypothesis is a particular  
106 assignment (i.e. a *partition*) of these individuals to subsets, where *each subset corresponds to*  
107 *a distinct inferred species*. Categories resulting from an SD analysis have been referred to by  
108 various terms, such as primary species hypothesis, operational taxonomic unit (OTUs),  
109 barcode index number (BINs; Ratnasingham & Hebert 2013), or even cluster (without any  
110 particular status (Fig. 1)), but all of them match the aforementioned definition of a subset.  
111 Furthermore, while some tools produce *de novo* species partitions (i.e. directly aggregating  
112 individuals into species hypotheses; exploratory methods), others statistically compare  
113 competing species hypotheses that have been defined *a priori* (hypothesis-testing methods),  
114 and these programs require a species partition as input. SD methods may also assign scores,  
115 either to the entire inferred partition (e.g., ASAP-score in the program ASAP; Puillandre et al.  
116 2021), to the distinctiveness of each subset from the others (e.g., posterior probabilities in the  
117 programs BPP and bPTP; Yang & Rannala 2010; Zhang et al. 2013), or to the presence of  
118 each individual in a given subset (e.g., probability of placement in calculation of BINs,  
119 Ratnasingham & Hebert 2013).

120

### 121 **A standardized Species PARTition format (SPART)**

122

123 Typically, each SD program exports the resulting species partitions in its own idiosyncratic  
124 format. Some, for instance, provide a table of assignments of individual specimens to the

125 subsets (e.g. GMYC) while others, conversely, list the different subsets with the included  
126 individuals (e.g. ABGD, PTP), whereas again others graphically report subsets on a tree  
127 topology (e.g. GMYC). These different formats may or may not include complementary data  
128 (e.g., scores, topologies, metadata, number of species delimited, etc.), and are not designed to  
129 be parsed by other tools for downstream analyses. Their manual conversion into a versatile  
130 and easily reusable plain text species partition (e.g., CSV) is not always straightforward. It  
131 can be particularly error prone and time consuming with large datasets, as species  
132 delimitations on several hundreds, or even thousands, of specimens are becoming common  
133 practice in molecular taxonomy (e.g., Ahrens et al. 2016, Renner et al 2017, Garcìa-Melo et  
134 al. 2019, Hoffmann et al. 2019, Solihah et al. 2020, Christodoulou et al. 2020).

135

136 We here propose a standardized species partition format, SPART, to enable compatibility  
137 between different tools producing (export) or using (import) species partitions. Our format  
138 facilitates:

139 (1) statistical comparison of different alternative species partitions such as their overall  
140 congruence, similarity or resolving power, identification of the subsets that are congruently  
141 delimited (currently implemented in the program LIMES v2.0; Ducasse et al. 2020);

142 (2) assessment of multiple competing SD hypotheses, including those used as input in e.g.  
143 DELINEATE and BPP to evaluate them (Sukumaran et al. 2020, Yang & Rannala 2010);

144 (3) visualization and comparison of species partitions (e.g., DNA-based species partitions  
145 compared with manually-edited species partitions obtained from alternative methods and data

146 such as Principal Component Analysis of morphometry, haplotype networks, geographic  
147 distribution, habitat type, external phenetic similarity, or simply, current taxonomy);

148 (4) extraction, from original data files, of specific data for each subset under different  
149 species partition assumptions (e.g. lists of molecular and morphological diagnostic character  
150 states, descriptive statistics characterizing each of the inferred species, or ecological or  
151 distributional traits); and

152 (5) potential taxonomic reassignment of specimens in databases.

153

154 More generally, the SPART format is designed to be versatile and fully integrative in the  
155 sense that it can include any species partition descriptors, independently of the method or  
156 data-type used to generate the species partition (Fig. 2). SPART does not convey any  
157 interpretation on the quality of the species partition, nor on the pros and cons of the methods  
158 used to define them, but is simply a common format that seeks at homogenising the way  
159 species partitions are recorded. It can therefore be implemented in any method used to  
160 generate one or several species partitions as output. Likewise, any method using (analysing,  
161 comparing, automatically reassigning or graphically representing) multiple subsets of  
162 specimens might benefit from being able to import SPART files as input data.

163

164 **Matricial and serial implementation of the SPART format**

165

166 SPART files include information on one or multiple species partitions for a given set of  
167 elements (i.e. individuals) and use standardized terminology to denote the number of species  
168 partitions included in the file (“N\_partitions”) and for each partition, the number of  
169 individuals (“N\_individuals”), number of subsets (“N\_subsets”), and the assignment of  
170 individuals to subsets (“Assignment”) (Supporting information 1). The syntax also allows to  
171 optionally include support values for species partitions, subsets, and the assignment of  
172 individuals to subsets, as well as original trees and the full command line used in the  
173 respective SD analyses, the program version number as well as comments and species  
174 partition comparison indices as calculated with LIMES 2.0, a new version of LIMES  
175 (Ducasse et al. 2020) recently published.

176 To account for the diversity of possible future applications, we propose two variants of  
177 the SPART format (for details see Supporting information 1). Both of these use largely the  
178 same terminology but represent the data differently:

179 The first SPART variant is optimized for human readability and its syntax has been  
180 designed to be compatible with Nexus (a widely used data format in phylogenetic inference  
181 software: Maddison et al. 1997). This allows to include SPART specifications as blocks in  
182 Nexus files if required by future applications. If information from multiple partitions is  
183 included, then it is combined into a single block, presenting the respective assignments and  
184 assignment scores per individual from different species partitions concatenated on a single  
185 line, separated by separator symbols. This enables easy manual transformation into a  
186 spreadsheet format if required. Due to the presentation of information from multiple partitions  
187 in one block as a concatenated matrix, we denote this variant as *matricial SPART* format, or  
188 simply SPART.



189 The second SPART variant is optimized for machine readability, and relies on XML  
190 (eXtensible Markup Language), a lightweight data-interchange format that can be easily  
191 parsed and written by software tools, while it can still be read and written by humans as well.  
192 When information from multiple partitions is included, each partition forms a separate block  
193 containing information on the number of subsets, individual assignments and assignment  
194 scores. We therefore denote this variant as *SPART.XML* format.

195

### 196 **Tools already implementing SPART and future perspectives**

197

198 The proposed format is already implemented in several widely-used SD programs. Both the  
199 matricial SPART and SPART.XML output files are already generated by GUI-driven  
200 standalone versions (<https://github.com/iTaxoTools>) of ABGD, ASAP, GMYC, PTP, mPTP,  
201 TR2 and DELINEATE (Vences et al. submitted), by the native Python version of TR2, and in  
202 the web versions of ABGD and ASAP; and in progress for the Python versions of GMYC and  
203 PTP. Furthermore, the species partition comparison tool LIMES v2.0 has been expanded to  
204 import, export and convert SPART files, in particular to (1) compare, by calculating indices  
205 (e.g., *Ctax*, *Ratx*, *Match Ratio*, cf. Ducasse et al. 2020) for species partitions from SPART  
206 files (including each one or several species partitions); (2) merge species partitions included  
207 in different SPART files into one SPART file, (3) import species partition(s) table(s) from  
208 spreadsheet editors such as Microsoft EXCEL and save it (them) into a single SPART file. A  
209 new software tool named SPARTMAPPER has also been developed; it takes SPART files as  
210 input along with a tab-delimited series of geographical coordinates linked to specimen names,  
211 plots the distribution of alternative delimited species on a map, and exports a .kml file to  
212 visualize this information in Google Earth.

213 [\[note to reviewers: all of these new software versions will be released before or upon publication of this](#)  
214 [manuscript, and the web based ABGD and ASAP are already freely available since February 2021](#)  
215 <https://bioinfo.mnhn.fr/abi/public/abgd/abgdweb.html>, <https://bioinfo.mnhn.fr/abi/public/asap/> ) ;  
216 [for review, various preliminary Windows executables are available under this link:](#)  
217 [https://hidrive.ionos.com/share/ohaymwcgjd#\\$/Win%20executables](https://hidrive.ionos.com/share/ohaymwcgjd#$/Win%20executables) ]

218 In the context of future work, we envisage the development of visualization tools to  
219 automatically illustrate information from species partitions along with support values and  
220 phylogenetic hypotheses (Fig. 1). There is still a long way to go before programs will be able  
221 to infer species based on combining evidence using different data sources such as genetics,  
222 morphology, ecology, behaviour, geographic distribution, etc. However, eventually, reliable  
223 computer-based, species delimitation procedures that mirror the procedures of integrative  
224 taxonomy will be at the core of next generation taxonomy (Vences 2020). Our SPART data  
225 exchange format would thus contribute to this next generation taxonomy, by simplifying  
226 computational approaches to completing the inventory of life on Earth.

227  
228

## 229 **Acknowledgments**

230

231 We are grateful to Susanne Renner who stimulated this work by leading the priority program  
232 SPP 1991 "Taxon-Omics" of the Deutsche Forschungsgemeinschaft (DFG), specifically in the  
233 context of a grant on taxonomic data integration and management (RE 603/29-1), and to  
234 many members of the Taxon-Omics consortium and Guillaume Achaz (MNHN) for fruitful  
235 discussion. MV and SK were supported by DFG grant VE247/20-1, NP by the European  
236 Research Council (ERC) under the European Union's Horizon 2020 research and innovation  
237 programme (grant agreement No. 865101), and AS and SL by the Klaus-Tschira foundation.

238

239

240

241

242

243

244 REFERENCES

245

246

- 247 Ahrens, D., Fujisawa, T., Krammer, H. J., Eberle, J., Fabrizi, S., & Vogler, A. P. (2016).  
248 Rarity and incomplete sampling in DNA-based species delimitation. *Systematic Biology*,  
249 65, 478–494. [doi:10.1093/sysbio/syw002](https://doi.org/10.1093/sysbio/syw002)
- 250 Camargo, A., & Sites, J. Jr. (2013). Species delimitation: a decade after the renaissance. In:  
251 The Species Problem - Ongoing Issues (ed. I. Y. Pavlinov). IntechOpen.
- 252 Carstens, B. C., Pelletier, T. A., Reid, N. M., & Satler, J. D. (2013). How to fail at species  
253 delimitation. *Molecular Ecology*, 22, 4369–4383. [doi:10.1111/mec.12413](https://doi.org/10.1111/mec.12413)
- 254 Chan, K. O., Hutter, C. R., Wood, P. L. Jr., Grismer, L. L., Das, I., & Brown, R. M. (2020).  
255 Gene flow creates a mirage of cryptic species in a Southeast Asian spotted stream frog  
256 complex. *Molecular Ecology*, 29(20), 3970–3987. [doi:10.1111/mec.15603](https://doi.org/10.1111/mec.15603)
- 257 Christodoulou, M., O'Hara, T., Hugall, A. F., Khodami, S., Rodrigues, C. F., Hilario, A.,  
258 Vink, A., & Martinez Arbizu, P. (2020) Unexpected high abyssal ophiuroid diversity in  
259 polymetallic nodule fields of the northeast Pacific Ocean and implications for  
260 conservation, *Biogeosciences*, 17, 1845–1876. [doi:10.5194/bg-17-1845-2020](https://doi.org/10.5194/bg-17-1845-2020)
- 261 Dayrat, B. (2005). Toward integrative taxonomy. *Biological Journal of the Linnean Society*,  
262 85, 407–415. [doi:10.1111/j.1095-8312.2005.00503.x](https://doi.org/10.1111/j.1095-8312.2005.00503.x)
- 263 Dellicour, S., & Flot J.-F. (2015). Delimiting species-poor data sets using single molecular  
264 markers: a study of barcode gaps, haplowebs and GMYC. *Systematic Biology*, 64, 900–  
265 908. [doi:10.1093/sysbio/syu130](https://doi.org/10.1093/sysbio/syu130)
- 266 de Queiroz, K. (1998). The general lineage concept of species, species criteria, and the  
267 process of speciation. In: D.J. Howard & S.H. Berlocher, S.H. (Eds.), *Endless Forms:*  
268 *Species and Speciation*. (pp. 57–75). New York: Oxford University Press.
- 269 de Queiroz, K. (2007). Species concepts and species delimitation, *Systematic Biology*, 56,  
270 879–886. [doi:10.1080/10635150701701083](https://doi.org/10.1080/10635150701701083)
- 271 Derkarabetian, S., & Hedin, M. (2014). Integrative taxonomy and species delimitation in  
272 harvestmen: a revision of the western North American genus *Sclerobunus* (Opiliones:  
273 Laniatores: Travunioidea). *PLoS One*, 9, e104982. [doi:10.1371/journal.pone.0104982](https://doi.org/10.1371/journal.pone.0104982)
- 274 Ducasse, J., Ung, V., Lecointre, G., Miralles, A. (2020). LIMES : a tool for comparing  
275 species partition. *Bioinformatics*, 2282–2283. [doi:10.1093/bioinformatics/btz911](https://doi.org/10.1093/bioinformatics/btz911)
- 276 Dufresnes, C., Brelsford, A., Crnobrnja-Isailović, J., Tzankov, N., Lymberakis, P., & Perrin,  
277 N. (2015). Timeframe of speciation inferred from secondary contact zones in the European  
278 tree frog radiation (*Hyla arborea* group). *BMC Evolutionary Biology* 15, 1-8. doi:  
279 10.1186/s12862-015-0385-2
- 280 Ence, D.D., & Carstens, B.C. (2011). SpedeSTEM: A rapid and accurate method for species  
281 delimitation. *Molecular Ecology Resources*, 11, 473–480. [doi:10.1111/j.1755-](https://doi.org/10.1111/j.1755-0998.2010.02947.x)  
282 [0998.2010.02947.x](https://doi.org/10.1111/j.1755-0998.2010.02947.x)
- 283 Flot, J.-F., Couloux, A., & Tillier, S. (2010). Haplowebs as a graphical tool for delimiting  
284 species: a revival of Doyle's "field for recombination" approach and its application to the  
285 coral genus *Pocillopora* in Clipperton. *BMC Evolutionary Biology*, 10, 372.  
286 [doi:10.1186/1471-2148-10-372](https://doi.org/10.1186/1471-2148-10-372)

- 287 Flot, J.-F. (2015). Species delimitation's coming of age, *Systematic Biology*, 64, 897–899.
- 288 Fontaneto, D., Herniou, E., Boschetti, C., Caprioli, M., Melone, G., Ricci, C., & Barraclough,  
289 T.G. (2007). Independently evolving species in asexual bdelloid rotifers. *PLoS Biology*, 5,  
290 e87. [doi:10.1371/journal.pbio.0050087](https://doi.org/10.1371/journal.pbio.0050087)
- 291 Fujisawa, T., Aswad, A., Barraclough, T. G. (2016). A rapid and scalable method for  
292 multilocus species delimitation using Bayesian model comparison and rooted triplets.  
293 *Systematic Biology*, 65(5), 759–771. [doi:10.1093/sysbio/syw028](https://doi.org/10.1093/sysbio/syw028)
- 294 García-Melo, J. E., Oliveira, C., Da Costa Silva, G. J., Ochoa-Orrego, L. E., Garcia Pereira, L.  
295 H., Maldonado-Ocampo, J. A. (2019). Species delimitation of Neotropical characins  
296 (Stevardiinae): Implications for taxonomy of complex groups. *PLoS ONE* 14(6),  
297 e0216786. [doi:10.1371/journal.pone.0216786](https://doi.org/10.1371/journal.pone.0216786)
- 298 Good, D. A., & Wake, D. B. (1992). Geographic variation and speciation in the torrent  
299 salamanders of the genus *Rhyacotriton* (Caudata: Rhyacotritonidae). *University of*  
300 *California Publications in Zoology*, 126, 1–91.
- 301 Hofmann, E. P., Nicholson, K. E., Luque-Montes, I. R., Köhler, G., Cerrato-Mendoza, C. A.,  
302 Medina-Flores, M., Wilson, L. D., & Townsend, J. H. (2019). Cryptic diversity, but to  
303 what extent? Discordance between single-locus species delimitation methods within  
304 mainland anoles (Squamata: Dactyloidae) of Northern Central America. *Frontiers in*  
305 *Genetics*. 10, 11. [doi:10.3389/fgene.2019.00011](https://doi.org/10.3389/fgene.2019.00011)
- 306 Hrbacek, K. & Jech, T. (1999). Introduction to set theory, third edition, revised and expanded.  
307 Monographs and Textbooks in pure and applied mathematics, vol. 220, Marcel Dekker Inc.  
308 Ney York, Basel.
- 309 Jones, G. (2017). Algorithmic improvements to species delimitation and phylogeny estimation  
310 under the multispecies coalescent. *Journal of Mathematical Biology*, 74, 447.  
311 [doi:10.1007/s00285-016-1034-0](https://doi.org/10.1007/s00285-016-1034-0)
- 312 Jones, G., Aydin, Z., & Oxelman, B. (2014). DISSECT: An assignment free Bayesian  
313 discovery method for species delimitation under the multispecies coalescent.  
314 *Bioinformatics*, 31, 991–998. [doi:10.1093/bioinformatics/btu770](https://doi.org/10.1093/bioinformatics/btu770)
- 315 Kapli, P., Lutteropp, S., Zhang, J., Kobert, K., Pavlidis, P., Stamatakis, A., & Flouri, T.  
316 (2016). Multi-rate Poisson Tree Processes for single-locus species delimitation under  
317 Maximum Likelihood and Markov Chain Monte Carlo. *Bioinformatics*, 33, 1630–1638.  
318 [doi:10.1093/bioinformatics/btx025](https://doi.org/10.1093/bioinformatics/btx025)
- 319 Knowles, L. L., Carstens, B. C. (2007) Delimiting species without monophyletic gene trees.  
320 *Systematic Biology*, 56 (6), 887–895. [doi:10.1080/10635150701701091](https://doi.org/10.1080/10635150701701091)
- 321 Leavitt, S. D., Moreau, C. S., & Lumbsch, H. T. (2015). The dynamic discipline of species  
322 delimitation: Progress toward effectively recognizing species boundaries in natural  
323 populations. In *Recent Advances in Lichenology* (pp. 11–44). New Delhi: Springer.  
324 [doi:10.1007/978-81-322-2235-4\\_2](https://doi.org/10.1007/978-81-322-2235-4_2)
- 325 Luo, A., Ling, C., Ho, S. Y. W., Zhu, C.-D. (2018). Comparison of methods for molecular  
326 species delimitation across a range of speciation scenarios. *Systematic Biology*, 67(5), 830–  
327 846. [doi:10.1093/sysbio/syy011](https://doi.org/10.1093/sysbio/syy011)
- 328 Maddison, D. R., Swofford, D. L., Maddison, W. P. (1997). NEXUS: An extensible file  
329 format for systematic information. *Systematic Biology*, 46, 590–621.  
330 [doi:10.1093/sysbio/46.4.590](https://doi.org/10.1093/sysbio/46.4.590)
- 331 Mason, N. A., Fletcher, N. K., Gill, B. A., Funk, C., Zamudio, K. R. (2020). Coalescent-based  
332 species delimitation is sensitive to geographic sampling and isolation by distance.  
333 *Systematics and Biodiversity*, 18(3), 269–280. [doi:10.1080/14772000.2020.1730475](https://doi.org/10.1080/14772000.2020.1730475)

- 334 Masters, B. C., Fan, V., & Ross, H. A. (2011). Species Delimitation - a Geneious plugin for  
335 the exploration of species boundaries. *Molecular Ecology Resources*, *11*, 154–157.  
336 [doi:10.1111/j.1755-0998.2010.02896.x](https://doi.org/10.1111/j.1755-0998.2010.02896.x)
- 337 Miralles, A. & Vences, M. (2013). New metrics for comparison of taxonomies reveal striking  
338 discrepancies among species delimitation methods in *Madascincus* lizards. *PlosONE*, *8*,  
339 e68242. [doi:10.1371/journal.pone.0068242](https://doi.org/10.1371/journal.pone.0068242)
- 340 Miralles, A., Bruy, T., Wolcott, K., Scherz, M. D., Begerow, D., Beszteri, B., Bonkowski, M.,  
341 Felden, J., Gemeinholzer, B., Glaw, F., Glöckner, F. O., Hawlitschek, O., Kostadinov, I.,  
342 Nattkemper, T. W., Printzen, C., Renz, J., Rybalka, N., Stadler, M., Weibulat, T., Wilke,  
343 T., Renner, S., Vences, M. (2020). Repositories for taxonomic data: where we are and what  
344 is missing. *Systematic Biology*, *69*, 1231–1253. [doi:10.1093/sysbio/syaa026](https://doi.org/10.1093/sysbio/syaa026)
- 345 Monaghan, M. T., Wild, R., Elliot, M., Fujisawa, T., Balke, M., Inward, D. J., Lees, D. C.,  
346 Ranaivosolo R., Eggleton, P., Barraclough, T.G., & Vogler, A.P. (2009). Accelerated  
347 species inventory on Madagascar using coalescent-based models of species delineation.  
348 *Systematic Biology*, *58*, 298–311. [doi:10.1093/sysbio/syp027](https://doi.org/10.1093/sysbio/syp027)
- 349 Padial, J.M., Miralles, A., De la Riva, I., & Vences, M. (2010). The integrative future of  
350 taxonomy. *Frontiers in Zoology*, *7*, 16. [doi:10.1186/1742-9994-7-16](https://doi.org/10.1186/1742-9994-7-16)
- 351 Pons, J., Barraclough, T. G., Gomez-Zurita, J., Cardoso, A., Duran, D. P., Hazell, S.,  
352 Kamoun, S., Sumlin, W. D., & Vogler, A. P. (2006). Sequence-based species delimitation  
353 for the DNA taxonomy of undescribed insects. *Systematic Biology*, *55*, 595–609.  
354 [doi:10.1080/10635150600852011](https://doi.org/10.1080/10635150600852011)
- 355 Postaire B., Magalon H., Bourmaud C. A., & Bruggemann J. H. (2016). Molecular species  
356 delimitation methods and population genetics data reveal extensive lineage diversity and  
357 cryptic species in Aglaopheniidae (Hydrozoa). *Molecular Phylogenetics and Evolution*,  
358 *105*, 36–49. [doi:10.1016/j.ympev.2016.08.013](https://doi.org/10.1016/j.ympev.2016.08.013)
- 359 Puillandre, N., Lambert, A., Brouillet, S., & Achaz, G. (2012b). ABGD, Automatic Barcode  
360 Gap Discovery for primary species delimitation, *Molecular Ecology*, *21*, 1864–1877.  
361 [doi:10.1111/j.1365-294X.2011.05239.x](https://doi.org/10.1111/j.1365-294X.2011.05239.x)
- 362 Puillandre, N., Modica, M. C., Zhang, Y., Sirovich, L., Boisselier, M. C., Cruaud, C.,  
363 Holford, M., Samadi, S. (2012a). Large-scale species delimitation method for hyperdiverse  
364 groups. *Molecular Ecology*, *11*, 2671–3691. [doi:10.1111/j.1365-294X.2012.05559.x](https://doi.org/10.1111/j.1365-294X.2012.05559.x)
- 365 Puillandre, N., Brouillet, S., Achaz, G. (2021). ASAP: Assemble Species by Automatic  
366 Partitioning. *Molecular Ecology Resources*, *21*(2), 609–620. [doi:10.1111/1755-0998.13281](https://doi.org/10.1111/1755-0998.13281)
- 367 Rabiee, M., Mirarab, S. (2019). SODA: Multi-locus species delimitation using quartet  
368 frequencies. *bioRxiv*, 869396. [doi:10.1101/869396](https://doi.org/10.1101/869396)
- 369 Rannala, B. (2015). The art and science of species delimitation. *Current Zoology*, *61*,  
370 846–853. [doi:10.1093/czoolo/61.5.846](https://doi.org/10.1093/czoolo/61.5.846)
- 371 Ratnasingham, S., & Hebert P.D.N. (2013). A DNA-based registry for all animal species: the  
372 Barcode Index Number (BIN) system. *PLoS ONE*, *8*: e66213.  
373 [doi:10.1371/journal.pone.0066213](https://doi.org/10.1371/journal.pone.0066213)
- 374 Renner, M.A., Heslewood, M.M., Patzak, S.D., Schäfer-Verwimp, A., & Heinrichs J. (2017).  
375 By how much do we underestimate species diversity of liverworts using morphological  
376 evidence? An example from Australasian *Plagiochila* (Plagiochilaceae:  
377 Jungermannopsida). *Molecular Phylogenetics and Evolution*, *107*, 576–593.  
378 [doi:10.1016/j.ympev.2016.12.018](https://doi.org/10.1016/j.ympev.2016.12.018)
- 379 Samadi, S., & Barberousse, A. (2006). The tree, the network, and the species. *Biological*  
380 *Journal of the Linnean Society*, *89*(3), 509–521. [doi:10.1111/j.1095-8312.2006.00689.x](https://doi.org/10.1111/j.1095-8312.2006.00689.x)



- 381 Sites, J. W., & Marshall J. C. (2003). Delimiting species: a Renaissance issue in systematic  
382 biology. *Trends in Ecology and Evolution*, 18, 462–470. [doi:10.1016/S0169-](https://doi.org/10.1016/S0169-5347(03)00184-8)  
383 [5347\(03\)00184-8](https://doi.org/10.1016/S0169-5347(03)00184-8)
- 384 Sholihah, A., Delrieu-Trottin, E., Sukmono, T., Dahruddin, H., Risdawati, R., Elvira, R.,  
385 Wibowo, A., Kusno, K., Busson, F., Sauri, S., Nurhaman, U., Zein, M. S. A., Fitriana, Y.,  
386 Utama, I., Muchlisin, Z. A., Agnèse, J. F., Hanner, R., Wowor, D., Steinke, D., Keith, P.,  
387 Rüber, L., Hubert, N., (2020). Disentangling the taxonomy of the subfamily Rasborinae  
388 (Cypriniformes, Danionidae) in Sundaland through DNA barcodes. *Scientific Reports*, 10,  
389 2818. [doi:10.1038/s41598-020-59544-9](https://doi.org/10.1038/s41598-020-59544-9)
- 390 Solís-Lemus, C., Knowles, L.L., & Ané, C. (2015). Bayesian species delimitation combining  
391 multiple genes and traits in a unified framework. *Evolution*, 69, 492–507.  
392 [doi:10.1111/evo.12582](https://doi.org/10.1111/evo.12582)
- 393 Spöri, Y., & Flot, J. □ F. (2020). HaplowebMaker and CoMa: two web tools to delimit species  
394 using haplowebs and conspecificity matrices. *Methods in Ecology and Evolution*, 11(11),  
395 1434–1438. [doi:10.1111/2041-210X.13454](https://doi.org/10.1111/2041-210X.13454)
- 396 Sukumaran, J., & Knowles, L. (2017). Multispecies coalescent delimits structure, not species.  
397 *Proceedings of the National Academy of Sciences USA*, 114(7), 1607–1612.  
398 [doi:10.1073/pnas.1607921114](https://doi.org/10.1073/pnas.1607921114)
- 399 Sukumaran, J., Holder, T. M., Knowles, L. L. (2020). Incorporating the speciation process  
400 into species delimitation. <https://github.com/jeetsukumaran/delineate>.
- 401 Vences, M. (2020). The promise of next-generation taxonomy. *Megataxa*, 1, 35–38.  
402 [doi:10.11646/megataxa.1.1.6](https://doi.org/10.11646/megataxa.1.1.6)
- 403 Vences, M., Miralles, A., Brouillet, S., Ducasse, J., Fedosov, A., Kharchev, V., Kumari, S,  
404 Patmanidis, S., Puillandre, N., Scherz, M. D., Kostadinov, I., Renner, S. S. (submitted).  
405 iTaxoTools 0.1: Kickstarting a specimen-based software toolkit for taxonomists. **Submitted**  
406 **manuscript will become publicly available on BioRxiv on 26 March 2021.**
- 407 Vieites, D. R., Wollenberg, K. C., Andreone, F., Köhler, J., Glaw, F., & Vences M. (2009).  
408 Vast underestimation of Madagascar’s biodiversity evidenced by an integrative amphibian  
409 inventory. *Proceedings of the National Academy of Sciences U. S. A.*, 106, 8267–8272.  
410 [doi:10.1073/pnas.0810821106](https://doi.org/10.1073/pnas.0810821106)
- 411 Weisrock, D. W., Rasoloarison R. M., Fiorentino, I., Ralison, J. M., Goodman, S. M.,  
412 Kappeler, P. M., & Yoder, A.D. (2010). Delimiting species without nuclear monophyly in  
413 Madagascar’s mouse lemurs. *PLoS ONE*, 5, e9883. [doi:10.1371/journal.pone.0009883](https://doi.org/10.1371/journal.pone.0009883)
- 414 Wiens, J. J., & Penkrot, T. A. (2002). Delimiting species using DNA and morphological  
415 variation and discordant species limits in spiny lizards (*Sceloporus*). *Systematic Biology*,  
416 51, 69–91. [doi:10.1080/106351502753475880](https://doi.org/10.1080/106351502753475880)
- 417 Yang, Z., & Rannala, B. (2010). Bayesian species delimitation using multilocus sequence  
418 data. *Proceedings of the National Academy of Sciences U. S. A.*, 107, 9264–9269.  
419 [doi:10.1073/pnas.0913022107](https://doi.org/10.1073/pnas.0913022107)
- 420 Yang, Z., & Rannala, B. (2014). Unguided species delimitation using DNA sequence data  
421 from multiple loci. *Molecular Biology and Evolution*, 31, 3125–3135.  
422 [doi:10.1093/molbev/msu279](https://doi.org/10.1093/molbev/msu279)
- 423 Zhang, J., Kapli, P., Pavlidis, P., & Stamatakis, A. (2013). A general species delimitation  
424 method with applications to phylogenetic placements. *Bioinformatics*, 29, 2869–2876.  
425 [doi:10.1093/bioinformatics/btt499](https://doi.org/10.1093/bioinformatics/btt499)
- 426 Zhang, C., Zhang, D. X., Zhu, T., Yang, Z. (2011). Evaluation of Bayesian coalescent method  
427 of species delimitation. *Systematic Biology*, 60(6), 747–761. [doi:10.1093/sysbio/syr071](https://doi.org/10.1093/sysbio/syr071)  
428

429

430

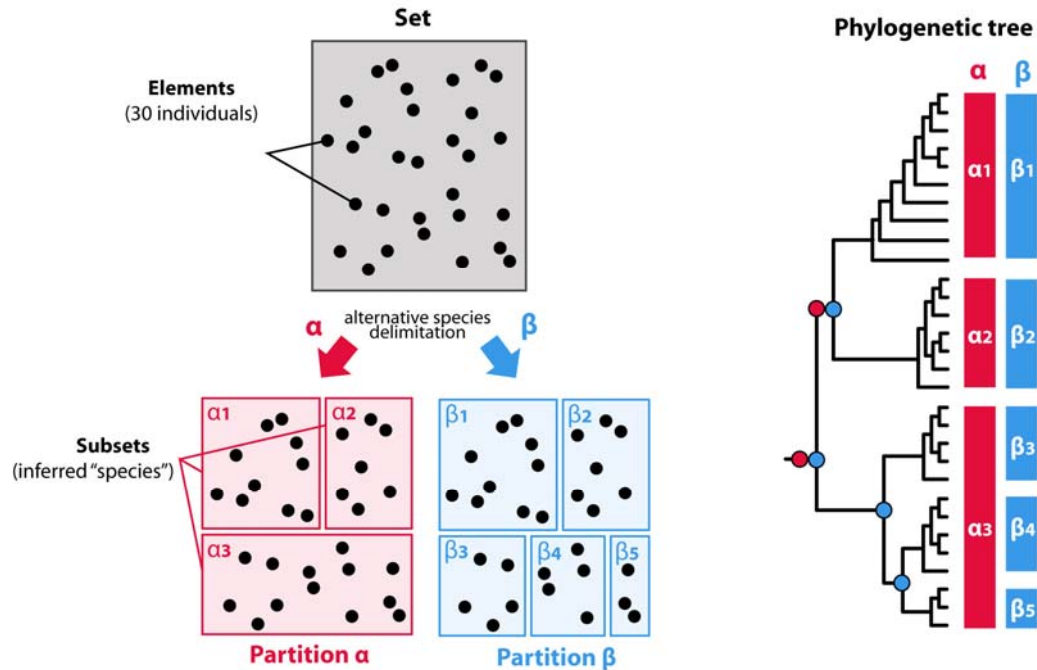

431

432

433

434

435

436

437

438

439

440

441

442

443

**Figure 1.** In mathematics, a partition of a set is a grouping of its elements into non-empty subsets, in such a way that every element is included in exactly one such subset. The main output of a species delimitation inference therefore corresponds to a partition, independently of the theoretical context, the biological input data, or the algorithms/models used. In our example, a set of 30 specimens is split by two different methods into two alternative partitions  $\alpha$  and  $\beta$ , corresponding to 3 and 5 putative species (subsets), respectively. For the sake of clarity, these two alternative species partitions are represented as boxes reported next to each “species clade” in a phylogenetic tree, with hypothetical speciation events highlighted by circles via a corresponding color. Note that not all SD methods rely on a tree topology, and may therefore delimit non-monophyletic units (e.g., methods based on morphological or molecular divergence).



444

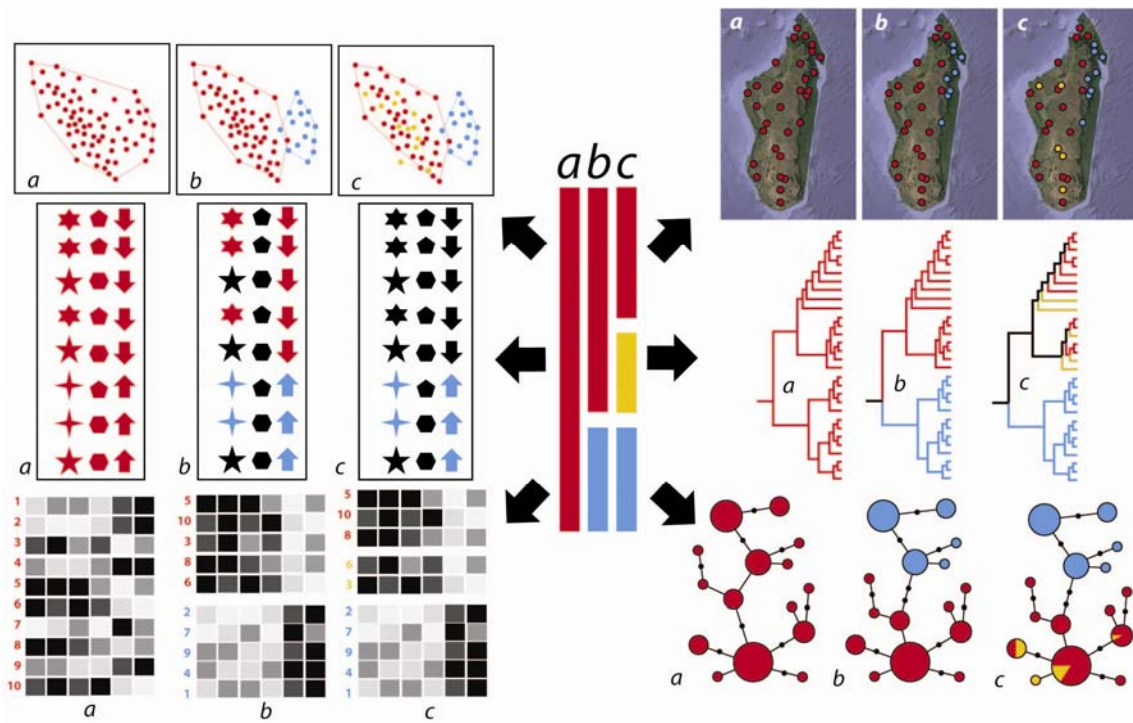

445

446 **Figure 2.** Illustration of exemplary potential applications of a species partition (SPART) file.  
447 If it can be parsed by other programs, SPART might facilitate the exploration of taxonomic  
448 datasets under various delimitation assumptions (such as morphometric Principal Component  
449 Analysis, automated extraction of diagnostic traits, heatmap of meristic morphological traits,  
450 distribution map, mitochondrial DNA-based phylogenetic tree, or haplotype network from  
451 nuclear DNA). In the present example, the partition b represents the optimal delimitation from  
452 a taxonomic perspective.  
453

454

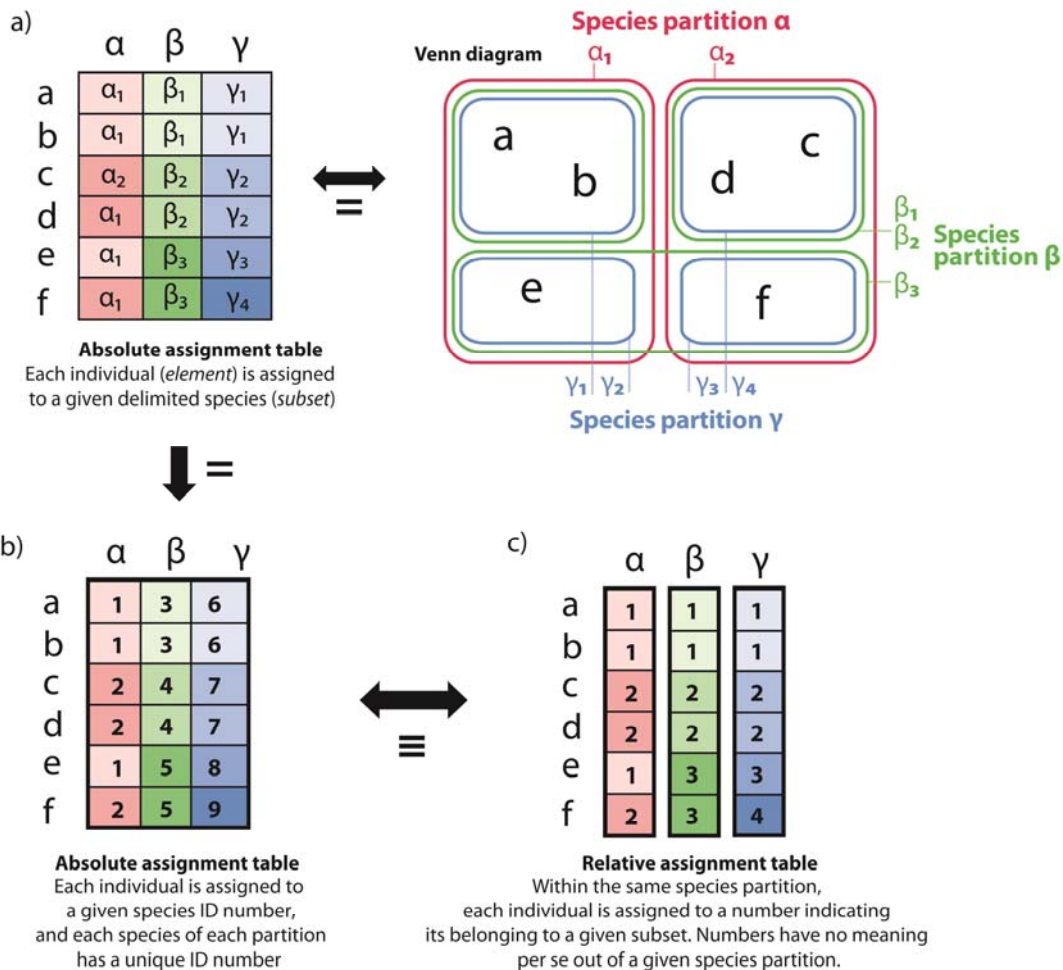

455

456

457

458

459

460

461

462

463

464

465

466

467

468

469

470

**Figure 3.** The SPART format can combine alternative species partitions of a same set of individuals (elements) into a unique multiple species partition file. (a) Example of set comprising six individuals split by three distinct SD analyses, resulting in three distinct species partitions ( $\alpha$ ,  $\beta$  and  $\gamma$ ). All these species partitions are hierarchically compatible (i.e. they conform to the mathematical definition of nested sets), with the exception of the pair  $\alpha$  -  $\beta$  (Venn diagram representing the alternative species partitions on the right, and corresponding assignment table on the left). These alternative species partitions can be coded in SPART either (b) by using a unique numbering for all the three species partitions (so that each species partition has its own set of species (subset) numbers) or (c) by using one numbering system per species partition. The latter representation allows combining different species partitions into a multiple species partition file without having to adjust each species or cluster number (subset). Both (b) and (c) are fully equivalent in SPART format, because the coding of each partition is independent from the others (subset assignment numbers have no meaning *per se*, they only indicate, within each partition, the common assignment to a specific subset).

471

472 **Table 1.** Automated tools dedicated to species delimitation. Abbreviations used: mtDNA, mitochondrial DNA; nDNA, nuclear DNA. Note that  
 473 for programs marked with an asterisk (GMYC, PTP, SODA, DELINEATE) GUI-driven versions with SPART implementation have been  
 474 prepared in the context of the iTaxoTools project but SPART output is not yet provided by all available versions. Other programs (ABGD,  
 475 ASAP, TR2) already include native SPART output.

476

| Tools                  | General principle                                    | Hypothetical partition needed as an input (a priori species assignment) | Optimal datasets and format                                                            | SPART implementation  | References                                                          |
|------------------------|------------------------------------------------------|-------------------------------------------------------------------------|----------------------------------------------------------------------------------------|-----------------------|---------------------------------------------------------------------|
| GMYC (mGMYC and bGMYC) | General mixed Yule-coalescent model                  | No                                                                      | mtDNA – ultrametric gene tree                                                          | Yes *                 | Pons et al. (2006), Fontaneto et al. (2007), Monaghan et al. (2009) |
| BPP, iBPP              | Multispecies coalescent model                        | Both options are possible                                               | nDNA – multilocus alignments + (optionally in iBPP) matrix of morphological characters | In preparation        | Yang & Rannala (2010, 2014), Solís-Lemus et al. (2015)              |
| SPEDESTEM              | Maximum likelihood and information theory            | Yes                                                                     | nDNA – ultrametric gene trees from multiple loci (nwk)                                 | No                    | Ence and Carstens (2011)                                            |
| ABGD                   | DNA barcode gap detection                            | No                                                                      | mtDNA – sequence alignment or distance matrix                                          | Yes                   | Puillandre et al. (2012)                                            |
| SPECIES DELIMITATION   | Coalescence / tree based approach                    | Yes                                                                     | Topology (ultrametric tree)                                                            | No                    | Masters et al. (2011)                                               |
| BINs                   | DNA barcode distance threshold + Markov clustering.  | No                                                                      | mtDNA – sequence alignment                                                             | No                    | Ratnasingham & Hebert (2013)                                        |
| PTP (mPTP and bPTP)    | Multi-rate Poisson ree processes model               | No                                                                      | Non ultrametric tree (nwk or NEXUS tree)                                               | Yes (mPTP and bPTP) * | Zhang et al. (2013), Kapli et al. (2016)                            |
| DISSECT                | Multispecies coalescent model                        | No                                                                      | nDNA – multilocus alignments                                                           | No                    | Jones et al. (2014)                                                 |
| TR2                    | Multispecies coalescent model                        | No                                                                      | nDNA – rooted gene trees from multiple loci (nwk)                                      | Yes                   | Fujisawa et al. (2016)                                              |
| STACEY                 | Multispecies coalescent model                        | No                                                                      | nDNA – multilocus alignments                                                           | No                    | Jones (2017)                                                        |
| SODA                   | Quartet frequencies, based on coalescent model       | No                                                                      | Multiple gene tree topologies                                                          | Yes *                 | Rabiee & Mirarab (2019)                                             |
| HaplowebMaker / CoMa   | Mutual allelic exclusivity                           | No                                                                      | nDNA – multilocus alignments                                                           | No                    | Spöri & Flot (2020)                                                 |
| ASAP                   | Distance-based partitions + coalescent-based scoring | No                                                                      | mtDNA – sequence alignment or distance matrix                                          | Yes                   | Puillandre et al. (2021)                                            |
| DELINEATE              | Multispecies coalescent model                        | Yes                                                                     | Rooted ultrametric tree (nwk or NEXUS)                                                 | Yes *                 | Sukumaran et al. (2020)                                             |

477
